# Supplementary material
Source: publisher site journal article supplement (https://www.dovepress.com/article/589578)
Supplement: Supplementary file 1 [file 589578_Table%20S1_1.pdf]

Table S1. Search Strategy

| Database       | Query                                                                                                                                                                                                                                                                                                                                                                                                                                                                                                                                                                                                                                                                                                                                                                                                                                                                                                                                                                                                                                                                                                                                                                                                                                                                                                                                                                                                                                                                                                                                                                                    | Results |
|----------------|------------------------------------------------------------------------------------------------------------------------------------------------------------------------------------------------------------------------------------------------------------------------------------------------------------------------------------------------------------------------------------------------------------------------------------------------------------------------------------------------------------------------------------------------------------------------------------------------------------------------------------------------------------------------------------------------------------------------------------------------------------------------------------------------------------------------------------------------------------------------------------------------------------------------------------------------------------------------------------------------------------------------------------------------------------------------------------------------------------------------------------------------------------------------------------------------------------------------------------------------------------------------------------------------------------------------------------------------------------------------------------------------------------------------------------------------------------------------------------------------------------------------------------------------------------------------------------------|---------|
| Science Direct | nurses AND "electronic health records" AND UTAUT AND hospital                                                                                                                                                                                                                                                                                                                                                                                                                                                                                                                                                                                                                                                                                                                                                                                                                                                                                                                                                                                                                                                                                                                                                                                                                                                                                                                                                                                                                                                                                                                            | 118     |
| PubMed         | (((("nurses"[MeSH Terms] OR "nurse*" [Title/Abstract] OR "nursing staff" [Title/Abstract]<br>OR "clinical nurse*" [Title/Abstract] OR "staff nurse*" [Title/Abstract]<br>OR "registered nurse*" [Title/Abstract] OR "nurse manager*" [Title/Abstract]<br>OR "head nurse*" [Title/Abstract] OR "nurse leader*" [Title/Abstract]<br>OR "nursing personnel" [Title/Abstract] OR "bedside nurse*" [Title/Abstract]))<br>AND<br>(("Electronic Health Records" [MeSH Terms] OR "electronic health record*" [Title/Abstract]<br>OR "EHR" [Title/Abstract] OR "electronic medical record*" [Title/Abstract]<br>OR "EMR" [Title/Abstract] OR "computerized patient record*" [Title/Abstract]<br>OR "digital health record*" [Title/Abstract] OR "electronic documentation" [Title/Abstract]<br>OR "clinical information system*" [Title/Abstract] OR "health information system*" [Title/Abstract]))<br>AND<br>(("UTAUT" [Title/Abstract] OR "unified theory of acceptance" [Title/Abstract]<br>OR "technology acceptance" [Title/Abstract] OR "performance expectancy" [Title/Abstract]<br>OR "effort expectancy" [Title/Abstract] OR "social influence" [Title/Abstract]<br>OR "facilitating condition*" [Title/Abstract] OR "behavioral intention" [Title/Abstract]<br>OR "technology adoption" [Title/Abstract] OR "user acceptance" [Title/Abstract]))<br>AND<br>(("Hospitals" [MeSH Terms] OR "hospital*" [Title/Abstract]<br>OR "medical center*" [Title/Abstract] OR "healthcare facility" [Title/Abstract]<br>OR "inpatient" [Title/Abstract] OR "clinical setting*" [Title/Abstract]))) | 43      |
| EBSCOhost      | TI,AB(nurse* OR "nurse manager*" OR "clinical nurse*") AND TI,AB("electronic health record*" OR EHR OR "electronic medical record*" OR EMR) AND TI,AB(UTAUT OR "technology acceptance" OR "performance expectancy" OR "effort expectancy") AND TI,AB(hospital*)                                                                                                                                                                                                                                                                                                                                                                                                                                                                                                                                                                                                                                                                                                                                                                                                                                                                                                                                                                                                                                                                                                                                                                                                                                                                                                                          | 113     |
